# Supplementary material for: Field-based screening of selected oral antibiotics in Belize
Source: PubMed Central journal article supplement (PMC7299385; doi:10.1371/journal.pone.0234814), 2020-06-17
Supplement: pone.0234814.s005.pdf [file pone.0234814.s005.pdf]

Visual Inspection Checklist:

Adapted and Modified from FIP Tool for Visual Inspection of Medicine

1. Packaging

|                                                                                                                         | Yes | No | Other Observations |
|-------------------------------------------------------------------------------------------------------------------------|-----|----|--------------------|
| <b>1.1 Container and Closure</b>                                                                                        |     |    |                    |
| Does the container and closure protect the product from the outside environment; e.g. is the container properly sealed? |     |    |                    |
| Do they assure that the product will meet the proper specifications throughout its shelf life?                          |     |    |                    |
| Are the container and the closure appropriate for the product inside?                                                   |     |    |                    |
| Is the container safely sealed?                                                                                         |     |    |                    |

|                                                                                                               |  |  |  |
|---------------------------------------------------------------------------------------------------------------|--|--|--|
| <b>1.2 Label</b>                                                                                              |  |  |  |
| If there is a carton protecting the container, does the label on the carton match the label on the container? |  |  |  |
| Is all information on the label legible and indelible?                                                        |  |  |  |

| <b>1.2.1 The trade (brand) name</b>                                                                                                            | Yes | No | Other observations |
|------------------------------------------------------------------------------------------------------------------------------------------------|-----|----|--------------------|
| Is the trade name spelled correctly?                                                                                                           |     |    |                    |
| Is the medicinal product (trade name) registered in the country by the Drug Regulatory Authority)? Is the product legally sold in the country? |     |    |                    |
| Does the symbol ® follow the trade name?                                                                                                       |     |    |                    |
| For blister or foil strip packed products, is the trade name indelibly impressed or imprinted onto the strip?                                  |     |    |                    |
| <b>1.2.2 The active ingredient name (scientific name/generic name):</b>                                                                        |     |    |                    |

|                                                                                                                      |  |  |  |
|----------------------------------------------------------------------------------------------------------------------|--|--|--|
| Is the active ingredient name spelt correctly?                                                                       |  |  |  |
| Do the trade name and the active ingredient names correspond to the registered product?                              |  |  |  |
| <b>1.2.3 The manufacturer's name and logo:</b>                                                                       |  |  |  |
| Are the manufacturer's name and logo legible and correct?                                                            |  |  |  |
| Does the logo or hologram (if applicable) look authentic?                                                            |  |  |  |
| Does the logo or hologram (if applicable) change colour when viewed from different angles?                           |  |  |  |
| <b>1.2.4 The manufacturer's full address:</b>                                                                        |  |  |  |
| Is the manufacturer's full address legible and correct?                                                              |  |  |  |
| Has this company or its agent registered the product in the country?                                                 |  |  |  |
| <b>1.2.5 The medicine strength (mg/unit):</b>                                                                        |  |  |  |
| Is the strength - the amount of active ingredient per unit - clearly stated on the label?                            |  |  |  |
| For blister or foil strip packed products, is the medicine strength indelibly impressed or imprinted onto the strip? |  |  |  |
| <b>1.2.6 The dosage form (e.g., tablet/capsule):</b>                                                                 |  |  |  |
| Is the dosage form clearly indicated on the container label?                                                         |  |  |  |
| Does the dosage form stated on the label match the actual dosage form of the medication?                             |  |  |  |
| Is the indicated medicine under this dosage form registered and authorized for sale in the country?                  |  |  |  |
| <b>1.2.7 The number of units per container:</b>                                                                      |  |  |  |
| Does the number of dosage units listed on the label match the number of dosage units stated on the                   |  |  |  |

|            |  |  |  |
|------------|--|--|--|
| container? |  |  |  |
|------------|--|--|--|

| <b>1.2.8 Dosage statement (if appropriate)</b>                                                                   | Yes | No | Other observations |
|------------------------------------------------------------------------------------------------------------------|-----|----|--------------------|
| Is the dosage clearly indicated on the label?                                                                    |     |    |                    |
| Is the dosage stated on the label appropriate for the medicine in this form and strength?                        |     |    |                    |
| Is the product registered and authorized for sale in the country with this dosage?                               |     |    |                    |
| <b>1.2.9 The batch (or lot) number:</b>                                                                          |     |    |                    |
| Does the numbering system on the package correspond to that of the producing company?                            |     |    |                    |
| For blister or foil strip packed medicines, is the batch number indelibly impressed or imprinted onto the strip? |     |    |                    |

## 2. Physical characteristics of Tablets/Capsules

| <b>2.1 Uniformity of Shape:</b>                                       | Yes | No | Other observations |
|-----------------------------------------------------------------------|-----|----|--------------------|
| Are the tablets/capsules uniform in shape?                            |     |    |                    |
| <b>2.2 Uniformity of Size:</b>                                        |     |    |                    |
| Are the tablets/capsules uniform in size?                             |     |    |                    |
| <b>2.3 Uniformity of Colour:</b>                                      |     |    |                    |
| Are the tablets/capsules uniform in colour?                           |     |    |                    |
| <b>2.4 Uniformity of Texture:</b>                                     |     |    |                    |
| Do the tablets have a uniform coating?                                |     |    |                    |
| Is the base of the tablets fully covered?                             |     |    |                    |
| Are the tablets uniformly polished, free of powder, and non-sticking? |     |    |                    |
| <b>2.5 Markings (scoring, letters, etc):</b>                          |     |    |                    |
| Are markings uniform and identical?                                   |     |    |                    |
| Does the logo (if present) match that of the                          |     |    |                    |

|                                                                                             |  |  |  |
|---------------------------------------------------------------------------------------------|--|--|--|
| manufacturing company?                                                                      |  |  |  |
| <b>2.6 Breaks, Cracks and Splits:</b>                                                       |  |  |  |
| Are the tablets/capsules free of breaks, cracks, splits or pinholes?                        |  |  |  |
| <b>2.7 Embedded surface spots or contamination:</b>                                         |  |  |  |
| Are the tablets/capsules free of embedded surface spots and foreign particle contamination? |  |  |  |
| <b>2.8 Presence of empty capsules in the case of a sample of capsules:</b>                  |  |  |  |
| Is the sample examined free of empty capsules?                                              |  |  |  |
| <b>2.9 Smell</b>                                                                            |  |  |  |
| Does the medicine smell the same as the original (If available)? Does it smell peculiar?    |  |  |  |
